# Supplementary material for: Scalable lignin/graphite electrodes formed by mechanochemistry
Source: Royal Society of Chemistry journal article supplement (doi:10.1039/c9ra07507k), 2019-01-01
Supplement: c9ra07507k1.pdf [file c9ra07507k1.pdf]

## ESI

### **Scalable lignin/graphite electrodes formed by mechanochemistry**

Lianlian Liu,<sup>a</sup> Niclas Solin<sup>a</sup> and Olle Inganäs<sup>\*a</sup>

Department of Physics, Chemistry and Biology, Linköping University, SE-581 83 Linköping, Sweden

#### Content:

SI 1. Infrared spectroscopy of materials

SI 2 UV-VIS spectroscopy of lignin solutions

SI 3 Raman spectra of materials

SI 4 TGA measurements of hybrid materials

SI 5 Dependence of the redox peak currents on scan rate

SI 6 Charge-discharge data

SI 7 UV-VIS spectroscopy of electrolyte during LS leaching

SI 8 Mass loss of LS from electrode during immersion

SI 9 Mass loss and UV-VIS of leaching LS

SI 10 Discharge capacity of LS/graphite (4/1, w/w) hybrid material electrodes

SI 11 Self-discharge profiles of LS/graphite (4/1, w/w) hybrid material electrodes

SI 12 Stoichiometry calculation based on TGA results

SI. Figures

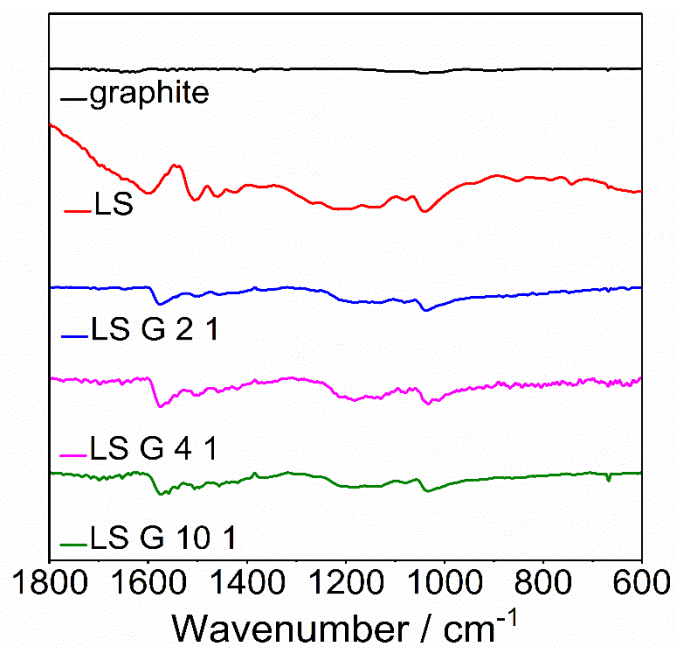

Fig. S1. IR transmittance spectra of LS, graphite, LS/graphite (2/1, 4/1, 10/1 w/w) pellets. The spectra have been shifted to allow visualization.

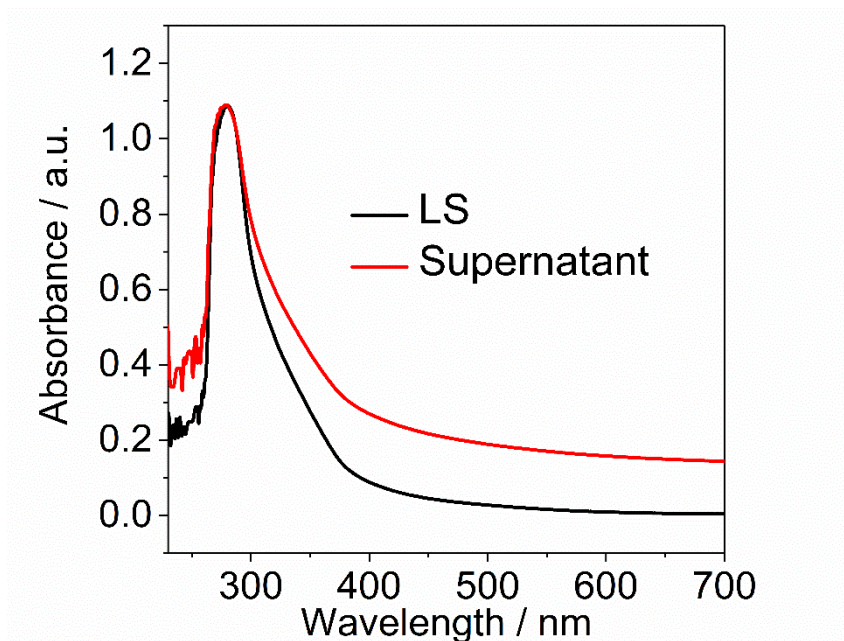

Fig. S2. UV-vis absorbance of LS solution in water and LS/graphite (5/1, w/w) supernatant.

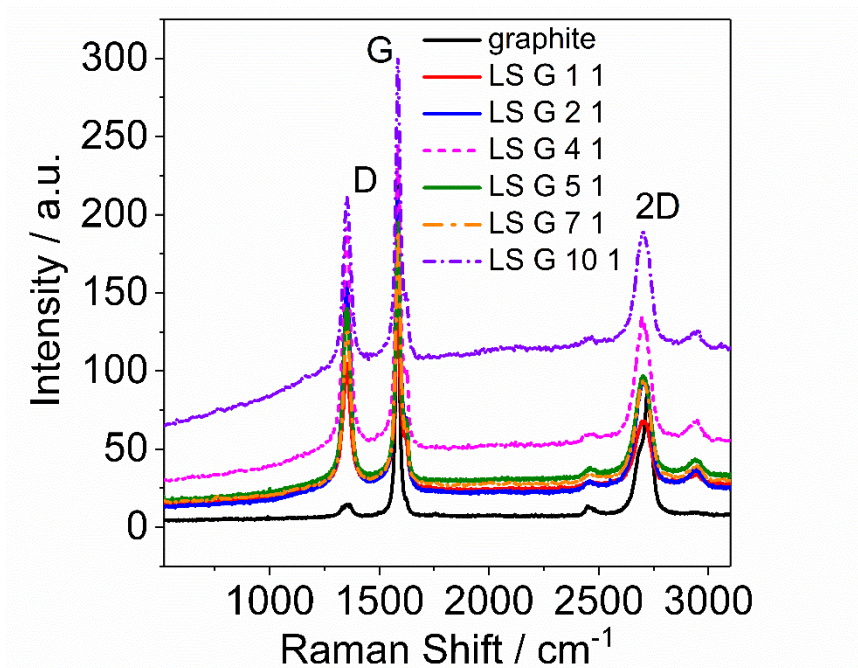

Fig. S3. Raman spectra of LS/graphite hybrid material electrodes with different primary stoichiometry, with 2.33 eV (532 nm) laser excitation energy.

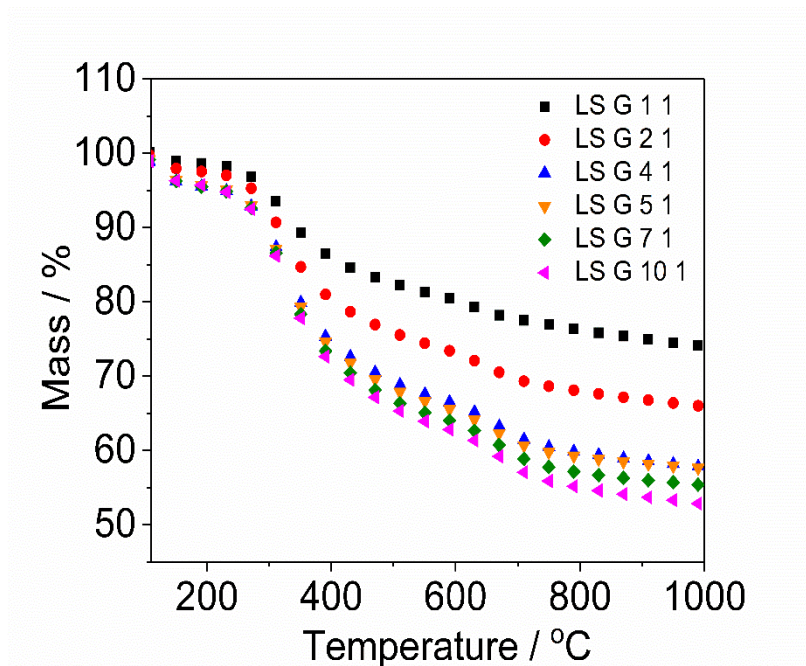

Fig. S4. Mass change of LS/graphite (1/1, 2/1, 4/1, 5/1, 7/1, 10/1 w/w) mixture vs. temperature in TGA curves. The measurements were obtained at a heating rate of  $10\text{ }^{\circ}\text{C min}^{-1}$  under Ar atmosphere.

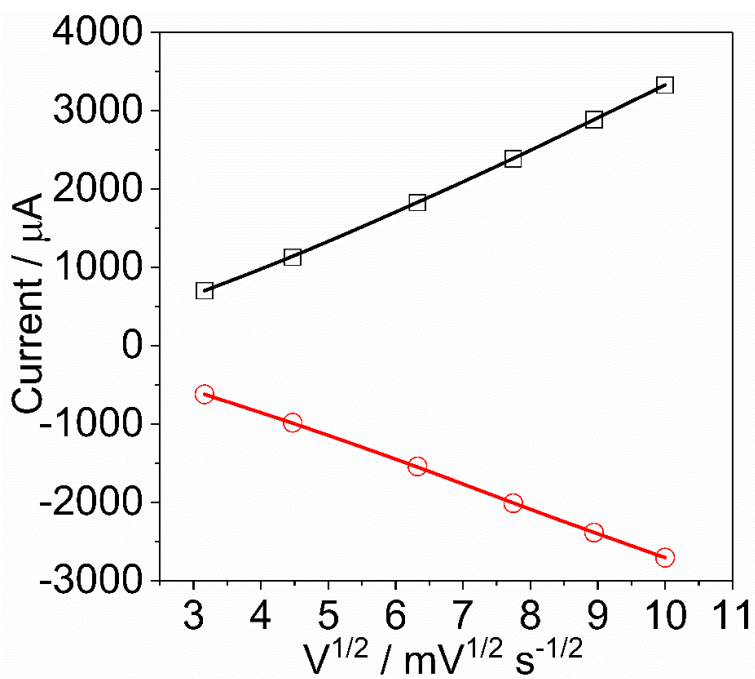

Fig. S5 Dependence of the redox peak currents on scan rate of the LS/graphite (4/1, w/w) hybrid material electrodes in  $0.1\text{ M HClO}_4$ .

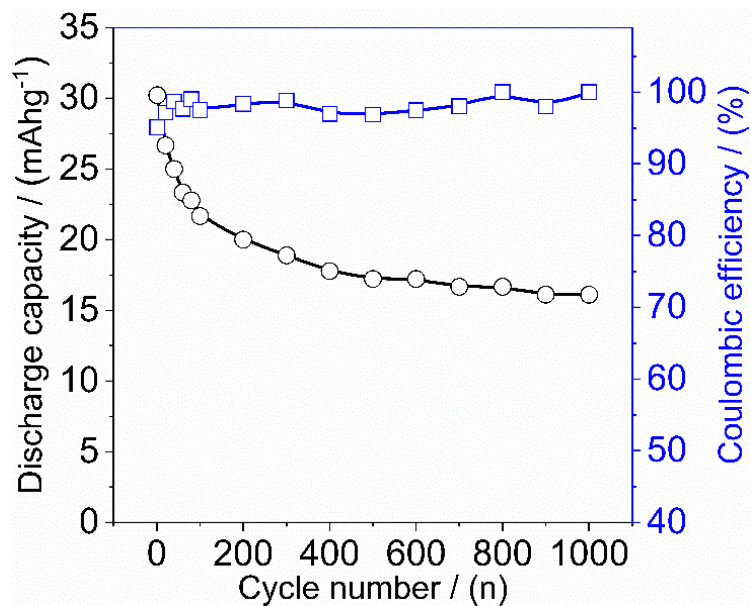

Fig. S6. Discharge capacity and coulombic efficiency of LS/graphite (4/1, w/w) hybrid material electrodes after reversible charge-discharge cycles at  $4 \text{ Ag}^{-1}$  in  $0.1 \text{ M HClO}_4$ .

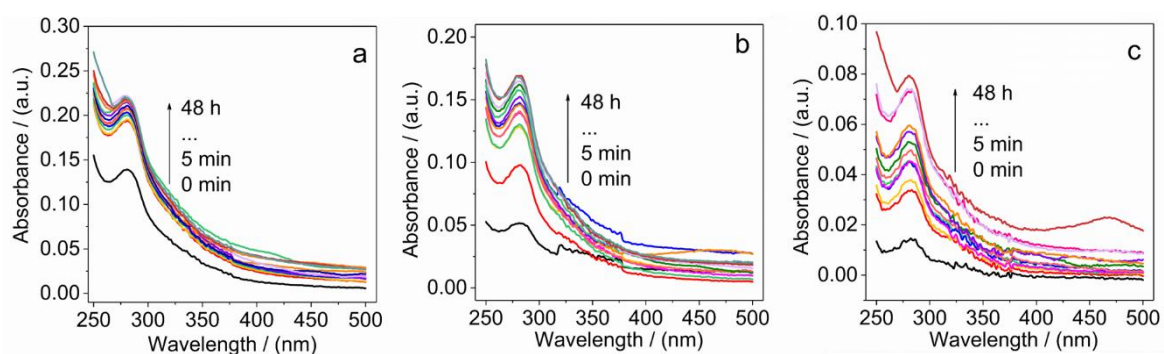

Fig. S7. The UV-vis absorption of the leaked LS from the LS/graphite (4/1, w/w) hybrid material electrodes into the electrolyte over time under different concentrations: (a)  $0.01 \text{ M HClO}_4$ , (b)  $0.1 \text{ M HClO}_4$  and (c)  $1 \text{ M HClO}_4$ .

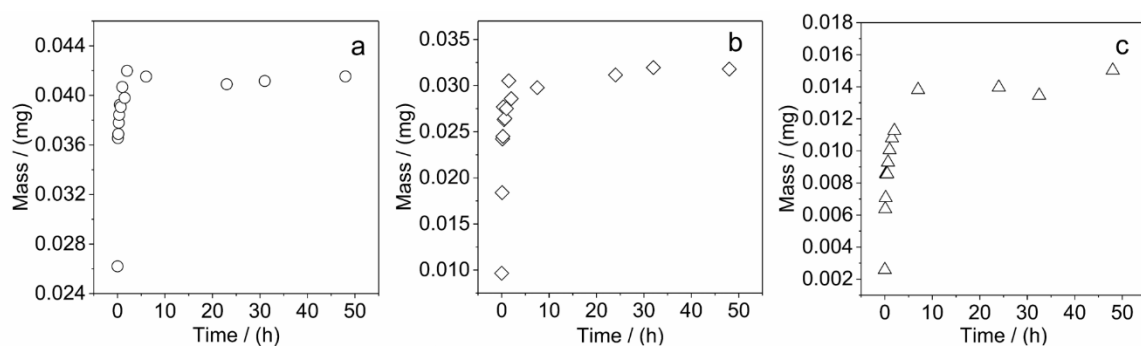

Fig. S8. The mass of the leaked LS from the LS/graphite (4/1, w/w) hybrid material electrodes into the electrolyte over time under different concentrations: (a) 0.01 M HClO<sub>4</sub>, (b) 0.1 M HClO<sub>4</sub> and (c) 1 M HClO<sub>4</sub>.

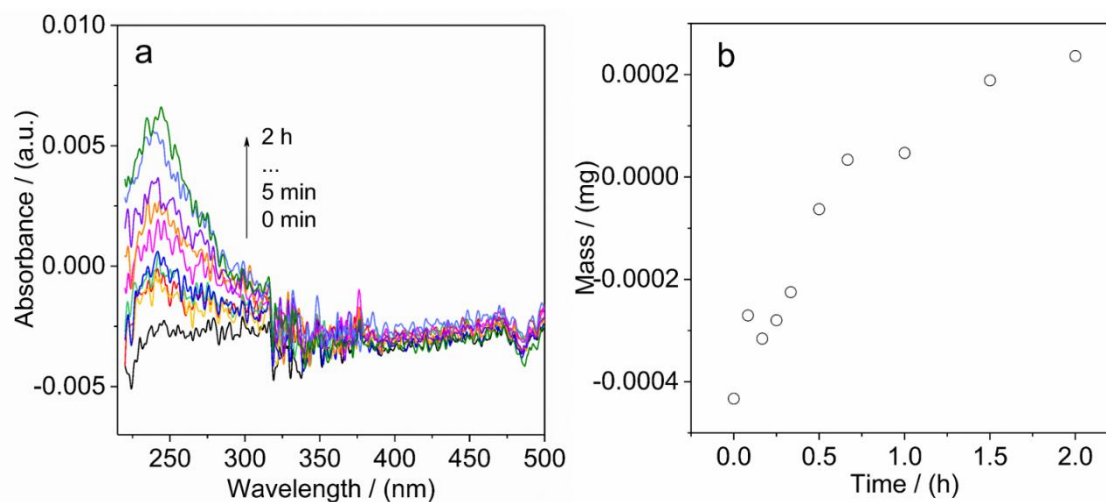

Fig. S9. (a) The UV-vis absorption and the (b) mass of the leaking LS from the LS/graphite (4/1, w/w) hybrid material electrodes into the electrolyte over time under 0.1 M HClO<sub>4</sub>.

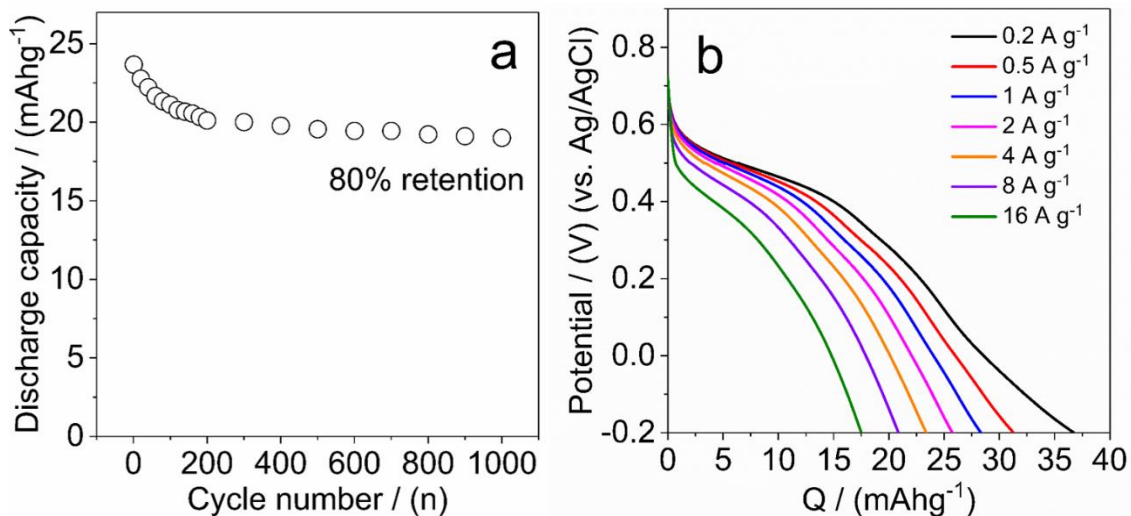

Fig. S10. (a) Discharge capacity after reversible charge-discharge cycles at  $4 \text{ A g}^{-1}$  and (b) galvanostatic discharge curves at the current density of  $0.2 \text{ A g}^{-1}$ ,  $0.5 \text{ A g}^{-1}$ ,  $1 \text{ A g}^{-1}$ ,  $2 \text{ A g}^{-1}$ ,  $4 \text{ A g}^{-1}$ ,  $8 \text{ A g}^{-1}$  and  $16 \text{ A g}^{-1}$ , of LS/graphite (4/1, w/w) hybrid material electrodes in  $0.1 \text{ M HClO}_4$ .

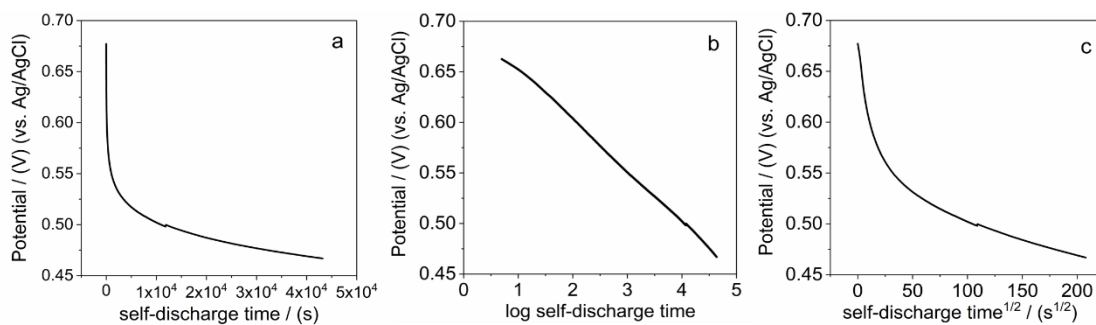

Fig. S11. Self-discharge profiles of LS/graphite (4/1, w/w) hybrid material electrodes in three electrode system at room temperature, in  $0.1 \text{ M HClO}_4$ .

## SI 12 Stoichiometry calculation based on TGA results

There is a mixture of lignosulfonate (LS) and graphite in the LS/graphite hybrid material electrodes. We assume the final residual mass of LS and graphite in the LS/graphite hybrid material electrodes are constant with the pure LS and graphite after heating. For example, the residual mass fraction of LS solid after heating is 47.2%, and the final residual mass fraction of LS in the hybrid materials is also 47.2% after heating. It is the same with graphite.

The total mass loss of LS/graphite hybrid electrodes after heating is equal to the mass loss of LS plus the mass loss of graphite in the LS/graphite hybrid electrodes, respectively.

Accordingly, LS/graphite (4/1, w/w) hybrid material electrodes shows a residual mass fraction of 72.8%. The residual mass fraction of LS solid and graphite are 47.2% and 98.0%, respectively. In the LS/graphite hybrid electrodes, we set the amount of LS is “x” and the amount of graphite is “y”. Below we have this equation:

$$x \cdot (1 - 0.472) + y \cdot (1 - 0.980) = (x + y) \cdot (1 - 0.728) \quad (\text{S1})$$

We can calculate the ratio of x and y:  $\frac{x}{y} = \frac{(0.98-0.728)}{(0.728-0.472)} = 0.99$ .

Then we can calculate the stoichiometry of the other LS/graphite (x/1, w/w, x = 1, 2, 5, 7, 10) hybrid material electrodes and LS/graphite (x/1, w/w, x = 1, 2, 4, 5, 7, 10) mixture.
